# Supplementary material for: Combined Treatment of Mori folium and Mori Cortex Radicis Ameliorate Obesity in Mice via UCP-1 in Brown Adipocytes
Source: MDPI journal article supplement (doi:10.3390/nu15173713), 2023-08-24
Supplement: s1 [file s1]

## Supplementary Figures and Tables

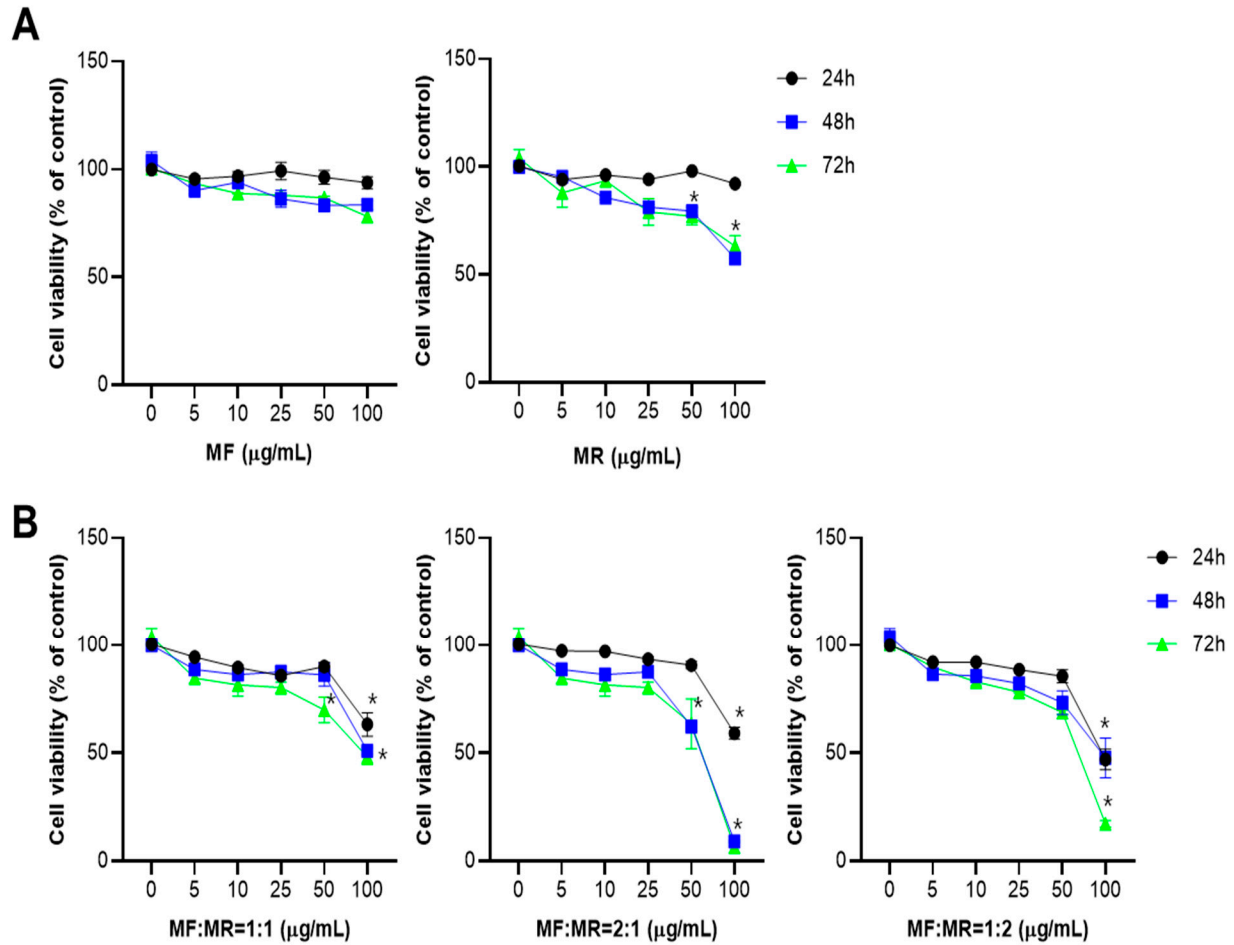

**Supplementary Figure S1. Effects of Mori Folium (MF) and Mori Cortex Radicis (MR) extracts on 3T3-L1 adipocytes viability.** 3T3-L1 preadipocytes were treated with 0, 5, 10, 25, 50 and 100  $\mu\text{g/mL}$  of ML and MR or ML/MR extract at the ratio, 1:1, 2:1 and 1:2 during 24, 48, and 72 h. (A-B) Cell viability was measured in different conditions. MTT assay was performed. Data are presented as mean  $\pm$  SEM (\*,  $p < 0.05$ , compared to 0 h at each indicated on concentration-treated group, respectively). ML; Mori Folium extract, MR; Mori Cortex Radicis extract, MF/MR; 1:1 mixture of MF/MR.

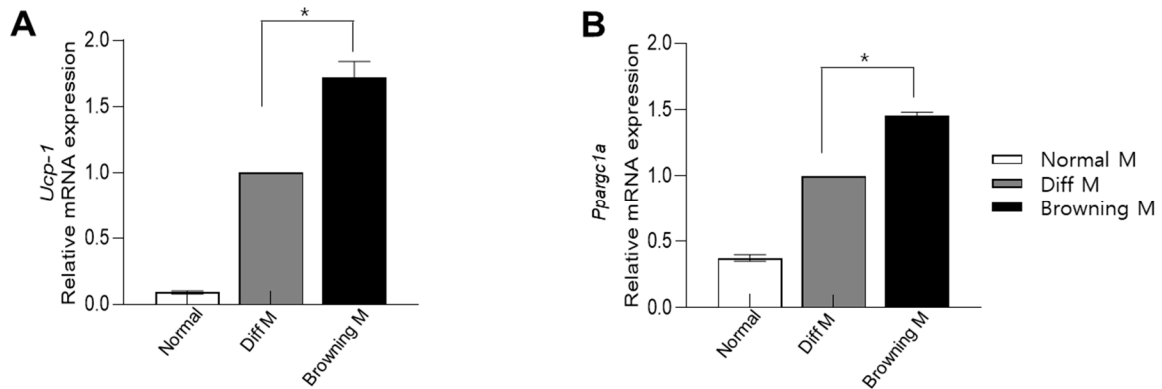

**Supplementary Figure S2. Thermogenesis gene expressions at the differentiation and browning medium-treated 3T3-L1 adipocytes.** 3T3-L1 preadipocytes were incubated with normal medium and differentiation medium for 7 days and maintenance and browning medium for 2 and the subsequent 5 days as described in Materials and Methods. *Ucp1* (A) and *Pparg1a* mRNA (B) expression was measured by real-time RT-PCR. Normal, normal medium treated group; Diff M, differentiated medium group; Browning M, browning medium-treated group.

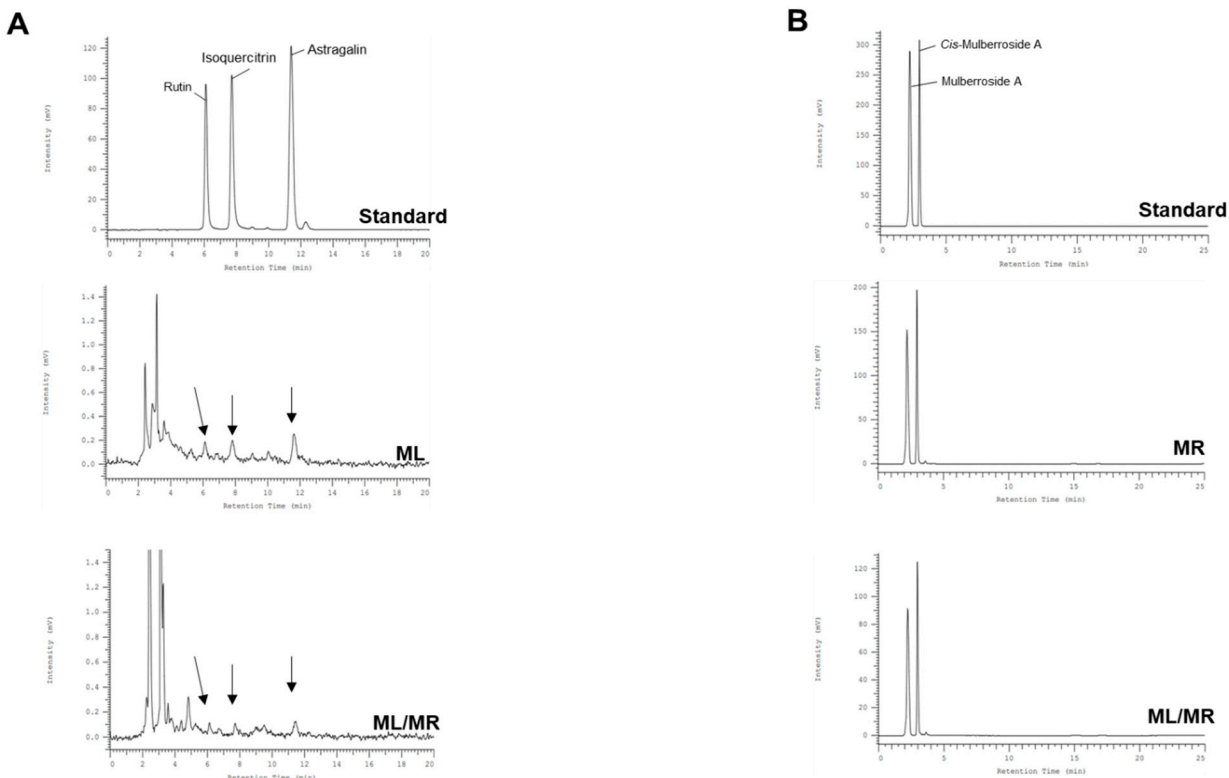

**Supplementary Figure S3. Characteristic analysis of bioactive components in extracts of Mori Folium leaf and Mori Radicis Cortex roots by high-performance liquid chromatography.** (A) Chromatogram at 370 and 320 nm showing retention time of rutin, isoquercitrin, and astragalin in ML, and ML/MR. and MR (B) Chromatogram showing retention time of mulaberroside A and *cis*-mulberroside A in ML, and ML/MR. ML; Mori Folium extract, MR; Mori Cortex Radicis extract, MF/MR; 1:1 mixture of MF/MR.

**Supplementary Table S1. HPLC condition for analysis of standards**

| HPLC condition   | Condition 1 <sup>1)</sup>                                 |       |       | Condition 2 <sup>2)</sup>                                 |       |       |
|------------------|-----------------------------------------------------------|-------|-------|-----------------------------------------------------------|-------|-------|
| Column           | Zorbax Eclipse Plus C18 column<br>(250 mm × 4.6 mm, 5 µm) |       |       | Zorbax Eclipse Plus C18 column<br>(250 mm × 4.6 mm, 5 µm) |       |       |
| Column temp.     | 40 °C                                                     |       |       | 40 °C                                                     |       |       |
| Flow rate        | 1 mL/min                                                  |       |       | 1 mL/min                                                  |       |       |
| Wave length      | 370 nm                                                    |       |       | 320 nm                                                    |       |       |
| Injection volume | 10 µL                                                     |       |       | 10 µL                                                     |       |       |
| Mobile solvent   | A: Acetonitrile                                           |       |       | A: Acetonitrile                                           |       |       |
|                  | B: Water                                                  |       |       | B: Water                                                  |       |       |
| Mobile phase     | Time<br>(min)                                             | A (%) | B (%) | Time<br>(min)                                             | A (%) | B (%) |
|                  | 0                                                         | 20    | 80    | 0                                                         | 5     | 95    |
|                  | 20                                                        | 20    | 80    | 25                                                        | 30    | 70    |

<sup>1)</sup> Condition 1: Rutin, isoquercitrin, astragalin

<sup>2)</sup> Condition 2: Mulberroside A, *Cis*-mulberroside A

**Supplementary Table S2. Real time PCR primer sequences**

| Gene           | Forward (5'→3')        | Reverse (5'→3')        |
|----------------|------------------------|------------------------|
| UCP-1          | GGCCTCTACGACTCAGTCCA   | TAAGCCGGCTGAGATCTTGT   |
| PGC-1 $\alpha$ | GAAAGGGCCAAACAGAGAGA   | GTAAATCACACGGCGCTCTT   |
| Cited          | GCGGTAAAAGATCGCAAGGC   | TTGTAGAAGGGGTGGCAGTA   |
| PRDM16         | GATGGGAGATGCTGACGGAT   | TGATCTGACACATGGCGAGG   |
| Tbx1           | CGAATGTTCCCCACGTTCCA   | GTCTACTCGGCCAGGTGTAG   |
| Fgf21          | CGTCTGCCTCAGAAGGACTC   | TCTACCATGCTCAGGGGGTC   |
| $\beta$ -actin | AAGACCTCTATGCCAACACAGT | AGCCAGAGCAGTAATCTCCTTC |

**Supplementary Table S3. Calibration standards for bioactive compounds**

| Compound                   | Calibration curve      | Correlation coefficient<br>( $R^2$ ) | Linear range<br>(mg/L) | LOD<br>(mg/L) | LOQ<br>(mg/L) |
|----------------------------|------------------------|--------------------------------------|------------------------|---------------|---------------|
| Rutin                      | $y = 10373x + 1226.6$  | 0.9994                               | 2.5 ~ 100              | 3.05          | 9.26          |
| Isoquercitrin              | $y = 12922x + 1216.8$  | 0.9995                               | 2.5 ~ 100              | 2.69          | 8.15          |
| Astragalin                 | $y = 18483x + 2689.5$  | 0.9995                               | 2.5 ~ 100              | 2.88          | 8.72          |
| Mulberroside A             | $y = 13423x - 5381.2$  | 0.9996                               | 10 ~ 200               | 5.23          | 15.85         |
| <i>Cis</i> -Mulberroside A | $y = 7119.9x - 1468.5$ | 0.9993                               | 10 ~ 200               | 6.57          | 19.91         |
